# Supplementary material for: External Validation of the Augmented Renal Clearance Predictor in Critically Ill COVID-19 Patients
Source: MDPI journal article supplement (doi:10.3390/antibiotics12040698), 2023-04-03
Supplement: s1 [file s1]

## Supplementary Tables

Table S1 Patient characteristics and clinical outcomes (per patient-day)

| Variables                                                      | All patient-days<br>(n=1064) | ARC<br>(n=246, 23.12%) | Not ARC<br>(n=818, 76.88%) | p-value |
|----------------------------------------------------------------|------------------------------|------------------------|----------------------------|---------|
| Age, years, median (IQR)                                       | 65 (60 – 72)                 | 60 (52 – 65)           | 70 (60 – 73)               | 0.03    |
| Gender male, number (%)                                        | 805 (75.7)                   | 173 (70.3)             | 632 (77.3)                 | 0.35    |
| Height, m, median (IQR)                                        | 1.8 (1.6 – 1.8)              | 1.8 (1.7 – 1.8)        | 1.7 (1.6 – 1.8)            | 0.19    |
| Weight, kg, median (IQR)                                       | 85.0 (75.0 – 104.0)          | 86.0 (70.0 – 105.0)    | 85.0 (76.5 – 103.0)        | 0.73    |
| BMI, median (IQR)                                              | 28.7 (26.2 – 32.1)           | 28.4 (26.3 – 32.1)     | 28.7 (26.2 – 31.9)         | 0.19    |
| Baseline serum creatinine, mg/dl, median (IQR)                 | 0.9 (0.8 – 0.9)              | 0.9 (0.7 – 0.9)        | 0.9 (0.8 – 1.0)            | <0.01   |
| APACHE II score, median (IQR)                                  | 19 (15 – 25)                 | 17 (14 – 22)           | 19 (16 – 25)               | <0.01   |
| Day from ICU admission, day, median (IQR)                      | 9.0 (4.0 – 18.0)             | 8.0 (4.0 – 13.0)       | 10.0 (5.0 – 20.0)          | <0.01   |
| Creatinine clearance, ml/min/1.73m <sup>2</sup> , median (IQR) | 91.9 (60.4 – 127.9)          | 152.7 (138.3 – 175.6)  | 74.8 (52.3 – 102.2)        | <0.01   |
| Length of stay in ICU, days, median (IQR)                      | 22 (13 – 38)                 | 18 (11 – 23)           | 24 (15 – 44)               | <0.01   |

Statistically significant difference was examined by using univariable generalized estimating equation (GEE) model, with ICU admission number as clustering variable, and days with ARC as reference group. BMI, body mass index; APACHE II score, Acute Physiology and Chronic Health Evaluation II score; IQR, interquartile range

Table S2 Transparent reporting of a multivariable prediction model for individual prognosis or diagnosis (TRIPOD)  
statement

| Section/Topic             | Item |     | Checklist Item                                                                                                                                                                                   | Location                                                       |
|---------------------------|------|-----|--------------------------------------------------------------------------------------------------------------------------------------------------------------------------------------------------|----------------------------------------------------------------|
| Title and abstract        |      |     |                                                                                                                                                                                                  |                                                                |
| Title                     | 1    | D;V | Identify the study as developing and/or validating a multivariable prediction model, the target population, and the outcome to be predicted.                                                     | Title                                                          |
| Abstract                  | 2    | D;V | Provide a summary of objectives, study design, setting, participants, sample size, predictors, outcome, statistical analysis, results, and conclusions.                                          | Abstract                                                       |
| Introduction              |      |     |                                                                                                                                                                                                  |                                                                |
| Background and objectives | 3a   | D;V | Explain the medical context (including whether diagnostic or prognostic) and rationale for developing or validating the multivariable prediction model, including references to existing models. | Background                                                     |
|                           | 3b   | D;V | Specify the objectives, including whether the study describes the development or validation of the model or both.                                                                                | Background                                                     |
| Methods                   |      |     |                                                                                                                                                                                                  |                                                                |
| Source of data            | 4a   | D;V | Describe the study design or source of data (e.g., randomized trial, cohort, or registry data), separately for the development and validation data sets, if applicable.                          | Methods: Study databases with inclusion and exclusion criteria |
|                           | 4b   | D;V | Specify the key study dates, including start of accrual; end of accrual; and, if applicable, end of follow-up.                                                                                   | Methods: Study databases with inclusion and exclusion criteria |
| Participants              | 5a   | D;V | Specify key elements of the study setting (e.g., primary care, secondary care, general population) including number and location of centres.                                                     | Methods: Study databases with inclusion and exclusion criteria |
|                           | 5b   | D;V | Describe eligibility criteria for participants.                                                                                                                                                  | Methods: Study databases with inclusion and exclusion criteria |
|                           | 5c   | D;V | Give details of treatments received, if relevant.                                                                                                                                                | N.A.                                                           |

|                              |     |     |                                                                                                                                                      |                                                                                                       |
|------------------------------|-----|-----|------------------------------------------------------------------------------------------------------------------------------------------------------|-------------------------------------------------------------------------------------------------------|
| Outcome                      | 6a  | D;V | Clearly define the outcome that is predicted by the prediction model, including how and when assessed.                                               | Methods: ARC definition, and ARC predictor                                                            |
|                              | 6b  | D;V | Report any actions to blind assessment of the outcome to be predicted.                                                                               | N.A.                                                                                                  |
| Predictors                   | 7a  | D;V | Clearly define all predictors used in developing or validating the multivariable prediction model, including how and when they were measured.        | Methods: ARC predictor                                                                                |
|                              | 7b  | D;V | Report any actions to blind assessment of predictors for the outcome and other predictors.                                                           | N.A.                                                                                                  |
| Sample size                  | 8   | D;V | Explain how the study size was arrived at.                                                                                                           | Results: Study cohort                                                                                 |
| Missing data                 | 9   | D;V | Describe how missing data were handled (e.g., complete-case analysis, single imputation, multiple imputation) with details of any imputation method. | ARC features have no missing values                                                                   |
| Statistical analysis methods | 10a | D   | Describe how predictors were handled in the analyses.                                                                                                | Methods: ARC predictor                                                                                |
|                              | 10b | D   | Specify type of model, all model-building procedures (including any predictor selection), and method for internal validation.                        | Methods: ARC predictor                                                                                |
|                              | 10c | V   | For validation, describe how the predictions were calculated.                                                                                        | Methods: ARC predictor                                                                                |
|                              | 10d | D;V | Specify all measures used to assess model performance and, if relevant, to compare multiple models.                                                  | Methods: Evaluation metrics for predictive performance                                                |
|                              | 10e | V   | Describe any model updating (e.g., recalibration) arising from the validation, if done.                                                              | N.A.                                                                                                  |
| Risk groups                  | 11  | D;V | Provide details on how risk groups were created, if done.                                                                                            | Methods: ARC definition                                                                               |
| Development vs. validation   | 12  | V   | For validation, identify any differences from the development data in setting, eligibility criteria, outcome, and predictors.                        | Methods: Study databases with inclusion and exclusion criteria, and ARC definition, and ARC predictor |

| <b>Results</b>           |     |     |                                                                                                                                                                                                       |                                                        |
|--------------------------|-----|-----|-------------------------------------------------------------------------------------------------------------------------------------------------------------------------------------------------------|--------------------------------------------------------|
| Participants             | 13a | D;V | Describe the flow of participants through the study, including the number of participants with and without the outcome and, if applicable, a summary of the follow-up time. A diagram may be helpful. | Results: Study cohort                                  |
|                          | 13b | D;V | Describe the characteristics of the participants (basic demographics, clinical features, available predictors), including the number of participants with missing data for predictors and outcome.    | Results: Study cohort                                  |
|                          | 13c | V   | For validation, show a comparison with the development data of the distribution of important variables (demographics, predictors and outcome).                                                        | Results: Study cohort                                  |
| Model development        | 14a | D   | Specify the number of participants and outcome events in each analysis.                                                                                                                               | N.A.                                                   |
|                          | 14b | D   | If done, report the unadjusted association between each candidate predictor and outcome.                                                                                                              | N.A.                                                   |
| Model specification      | 15a | D   | Present the full prediction model to allow predictions for individuals (i.e., all regression coefficients, and model intercept or baseline survival at a given time point).                           | N.A.                                                   |
|                          | 15b | D   | Explain how to use the prediction model.                                                                                                                                                              | N.A.                                                   |
| Model performance        | 16  | D;V | Report performance measures (with CIs) for the prediction model.                                                                                                                                      | Results: ARC predictor external validation performance |
| Model-updating           | 17  | V   | If done, report the results from any model updating (i.e., model specification, model performance).                                                                                                   | N.A.                                                   |
| <b>Discussion</b>        |     |     |                                                                                                                                                                                                       |                                                        |
| Limitations              | 18  | D;V | Discuss any limitations of the study (such as nonrepresentative sample, few events per predictor, missing data).                                                                                      | Discussion: the last paragraph                         |
| Interpretation           | 19a | V   | For validation, discuss the results with reference to performance in the development data, and any other validation data.                                                                             | Discussion: the second paragraph                       |
|                          | 19b | D;V | Give an overall interpretation of the results, considering objectives, limitations, results from similar studies, and other relevant evidence.                                                        | Discussion: the third paragraph                        |
| Implications             | 20  | D;V | Discuss the potential clinical use of the model and implications for future research.                                                                                                                 | Discussion: the first paragraph                        |
| <b>Other information</b> |     |     |                                                                                                                                                                                                       |                                                        |

|                           |    |     |                                                                                                                               |                               |
|---------------------------|----|-----|-------------------------------------------------------------------------------------------------------------------------------|-------------------------------|
| Supplementary information | 21 | D;V | Provide information about the availability of supplementary resources, such as study protocol, Web calculator, and data sets. | Supplementary digital content |
| Funding                   | 22 | D;V | Give the source of funding and the role of the funders for the present study.                                                 | Title page                    |

\*Items relevant only to the development of a prediction model are denoted by D, items relating solely to a validation of a prediction model are denoted by V, and items relating to both are denoted D;V. N.A., not applicable.

# Supplementary Figures

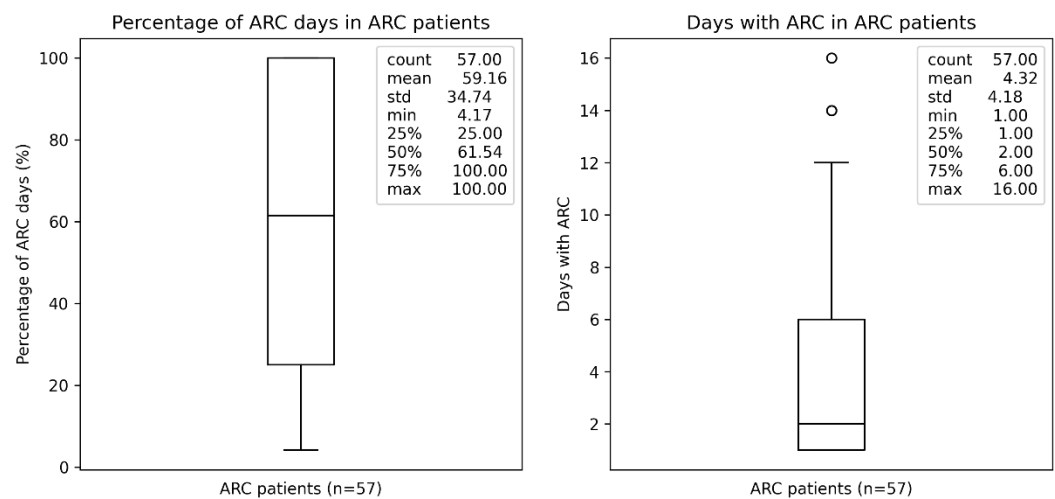

Figure S1 Percentage of ARC days (left) and number of days with ARC (right) in ARC patients; ARC, augmented renal clearance

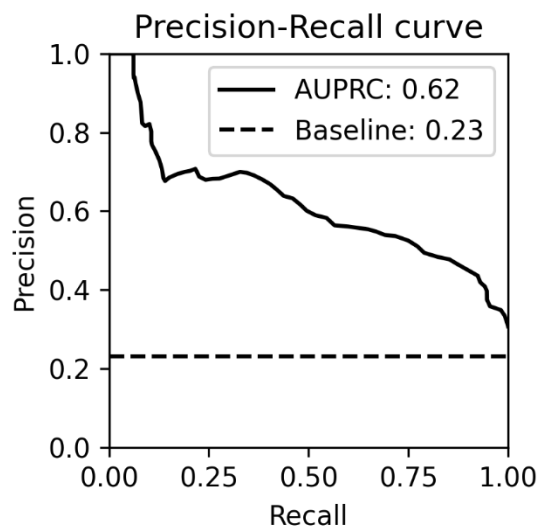

Figure S2 Precision recall curve. AUPRC, area under the precision recall curve. Baseline, the number of positive cases (patient-days with presence of augmented renal clearance) over the total number of patient-days

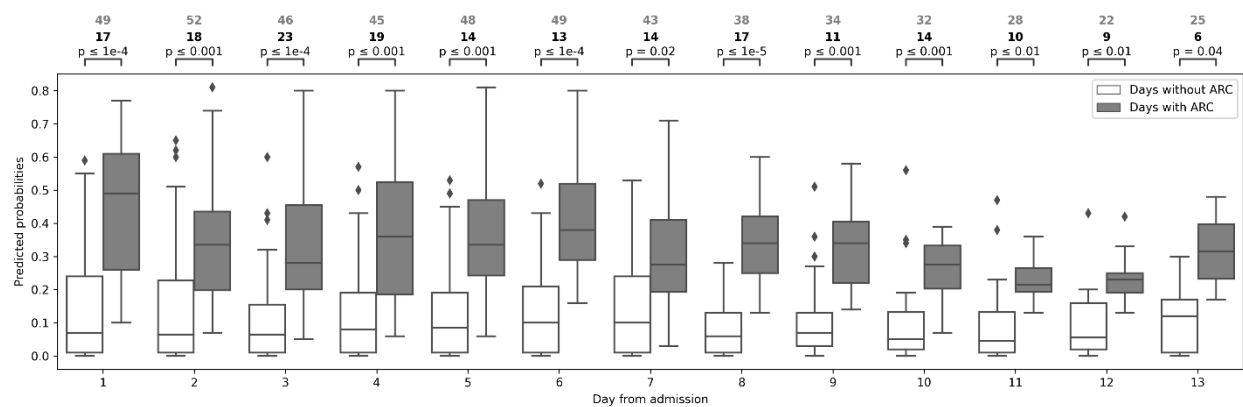

Figure S3 Comparison of predicted probabilities of ARC on each ICU day between patient-days with and without ARC, within the first two weeks of ICU admission. The black and grey numbers above the figure indicated the numbers of patient-days with and without ARC on each ICU day. ARC, augmented renal clearance

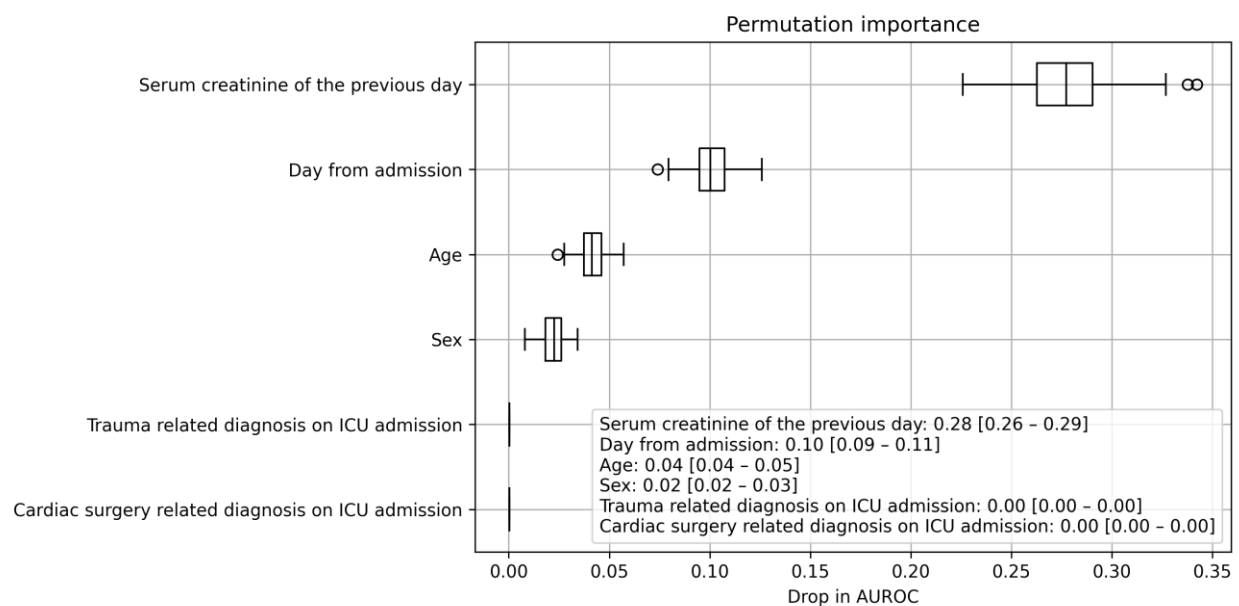

Figure S4 Boxplots of permutation importance of all augmented renal clearance predictor features with 100 repetitions. AUROC, area under the receiver operating characteristics curve
